# Supplementary material for: Investigation into repetitive concussion in sport (RECOS): study protocol of a prospective, exploratory, observational cohort study
Source: PubMed Central journal article supplement (PMC6615833; doi:10.1136/bmjopen-2019-029883), 2019-07-04
Supplement: bmjopen-2019-029883.reviewer_comments.pdf [file bmjopen-2019-029883.reviewer_comments.pdf]

## PEER REVIEW HISTORY

BMJ Open publishes all reviews undertaken for accepted manuscripts. Reviewers are asked to complete a checklist review form (<http://bmjopen.bmj.com/site/about/resources/checklist.pdf>) and are provided with free text boxes to elaborate on their assessment. These free text comments are reproduced below.

### ARTICLE DETAILS

|                            |                                                                                                                                                                                                                                    |
|----------------------------|------------------------------------------------------------------------------------------------------------------------------------------------------------------------------------------------------------------------------------|
| <b>TITLE (PROVISIONAL)</b> | An investigation into Repetitive Concussion in Sport (RECOS): A study protocol of a prospective, exploratory, observational cohort study                                                                                           |
| <b>AUTHORS</b>             | Yakoub, Kamal; Davies, David; Su, Zhangjie; Bentley, Conor; Forcione, Mario; Toman, Emma; Hammond, Douglas; Watson, Callum; Bishop, Jon; Cooper, Lauren; Barbey, Aron; Sawlani, Vijay; Di Pietro, V; Grey, Michael; belli, antonio |

### VERSION 1 - REVIEW

|                        |                                                                             |
|------------------------|-----------------------------------------------------------------------------|
| <b>REVIEWER</b>        | Jiri Dvorak<br>Swiss Concussion Center Schulthess Clinic Zurich Switzerland |
| <b>REVIEW RETURNED</b> | 01-Apr-2019                                                                 |

|                         |                                                    |
|-------------------------|----------------------------------------------------|
| <b>GENERAL COMMENTS</b> | well design study based upon the CISG publications |
|-------------------------|----------------------------------------------------|

|                        |                                                                                                                                          |
|------------------------|------------------------------------------------------------------------------------------------------------------------------------------|
| <b>REVIEWER</b>        | Allen Sills<br>Vanderbilt University Medical Center Nashville, TN USA<br>I am a full time employee of the National Football League (NFL) |
| <b>REVIEW RETURNED</b> | 18-Apr-2019                                                                                                                              |

|                         |                                                                                    |
|-------------------------|------------------------------------------------------------------------------------|
| <b>GENERAL COMMENTS</b> | Would like to have additional discussion of limitations of the research questions. |
|-------------------------|------------------------------------------------------------------------------------|

### VERSION 1 – AUTHOR RESPONSE

Reviewer: 2

Would like to have additional discussion of limitations of the research questions.

Page 5 lines 97-101

Page 8 lines 181-183

Page 15 line 283
